# Supplementary material for: Russian Regional Differences in Allele Frequencies of CFTR Gene Variants: Genetic Monitoring of Infertile Couples
Source: MDPI journal article supplement (doi:10.3390/genes15010045), 2023-12-27
Supplement: s1 [file s1]

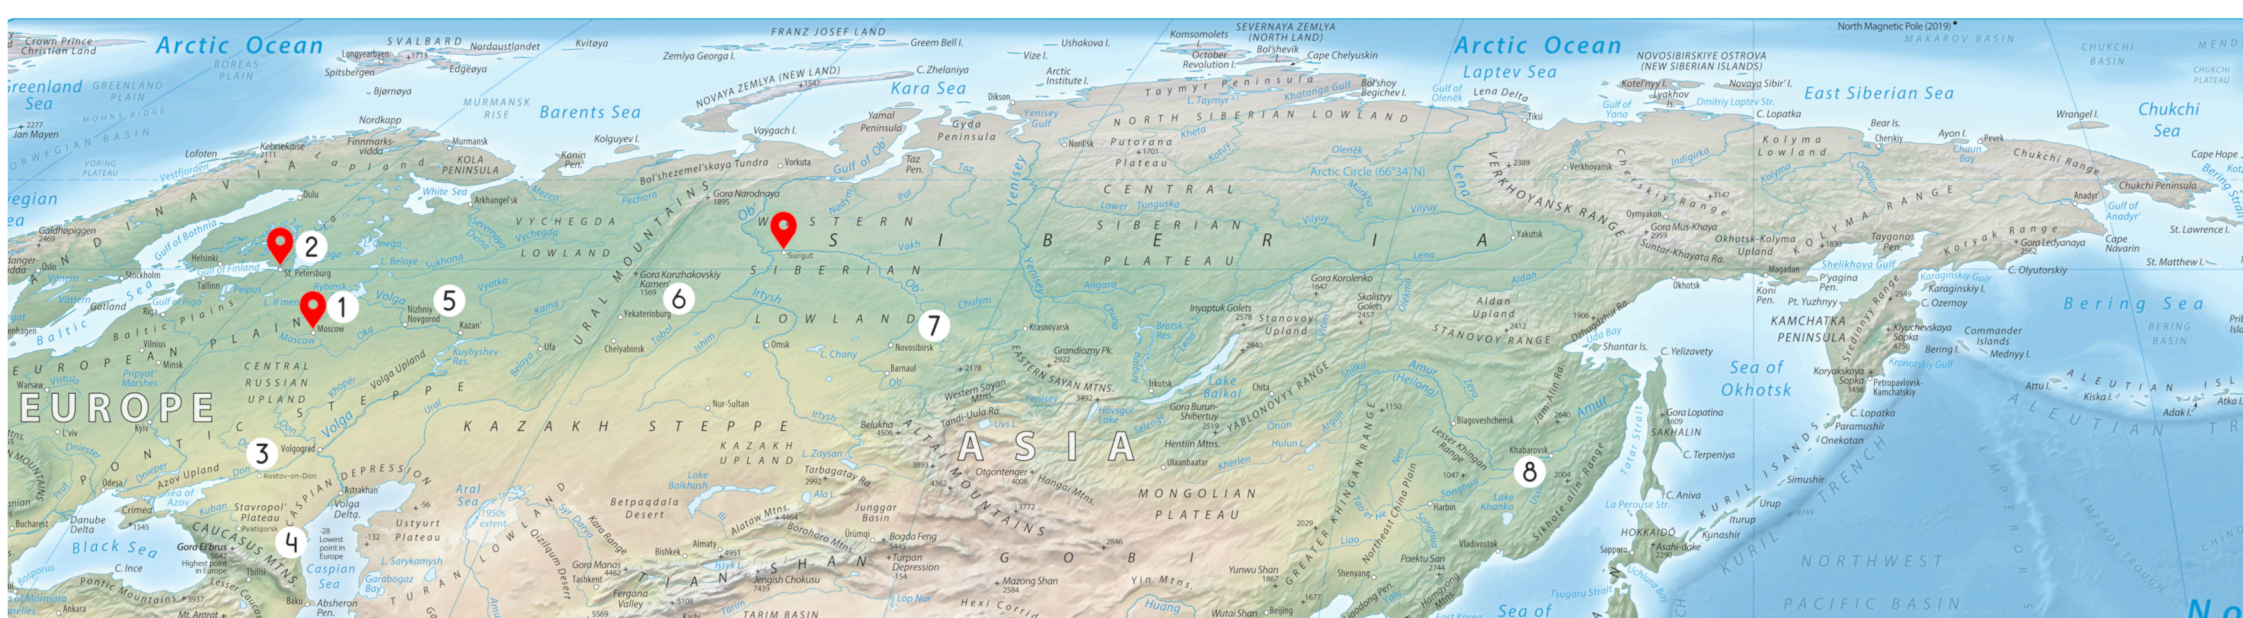

- Administrative centre of
- 1 Central Federal District
  - 2 Northwestern Federal District
  - 3 Southern Federal District
  - 4 North Caucasian Federal district
  - 5 Volga Federal District
  - 6 Ural Federal District
  - 7 Siberian Federal District
  - 8 Far Eastern Federal District

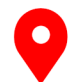

Location of local biocollection
